# Supplementary material for: The developing premature infant gut microbiome is a major factor shaping the microbiome of neonatal intensive care unit rooms
Source: PubMed Central journal article supplement (PMC6011520; doi:10.1186/s40168-018-0493-5), 2018-06-20

**A**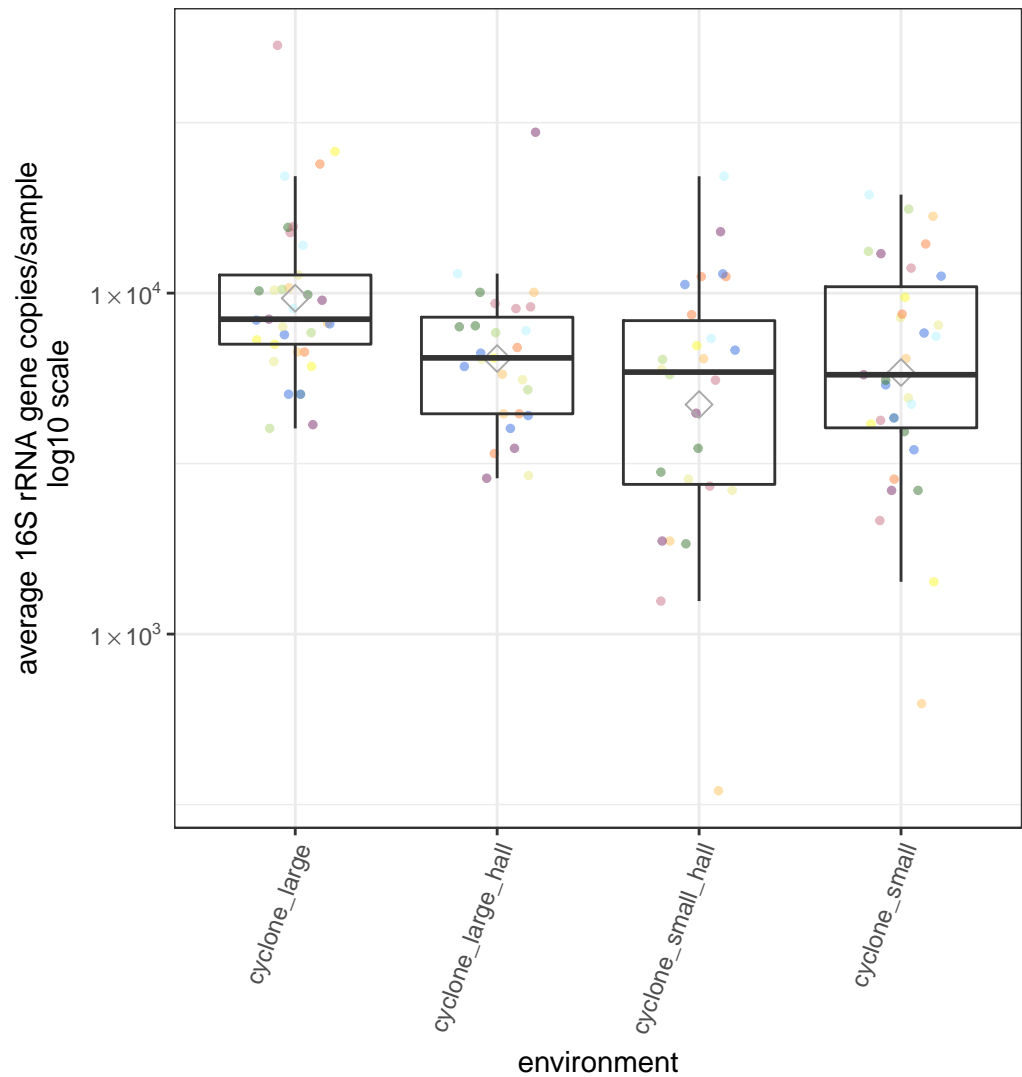**B**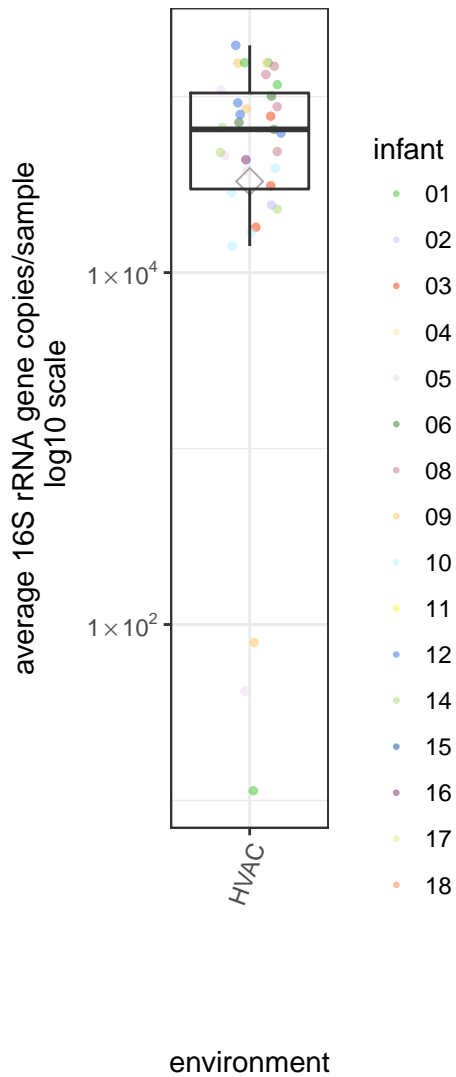

Supplement: 40168_2018_493_MOESM2_ESM.pdf [file 40168_2018_493_MOESM2_ESM.pdf]
