# Supplementary material for: The developing premature infant gut microbiome is a major factor shaping the microbiome of neonatal intensive care unit rooms
Source: PubMed Central journal article supplement (PMC6011520; doi:10.1186/s40168-018-0493-5), 2018-06-20
Supplement: 40168_2018_493_MOESM6_ESM.pdf [file 40168_2018_493_MOESM6_ESM.pdf]

Infant 1

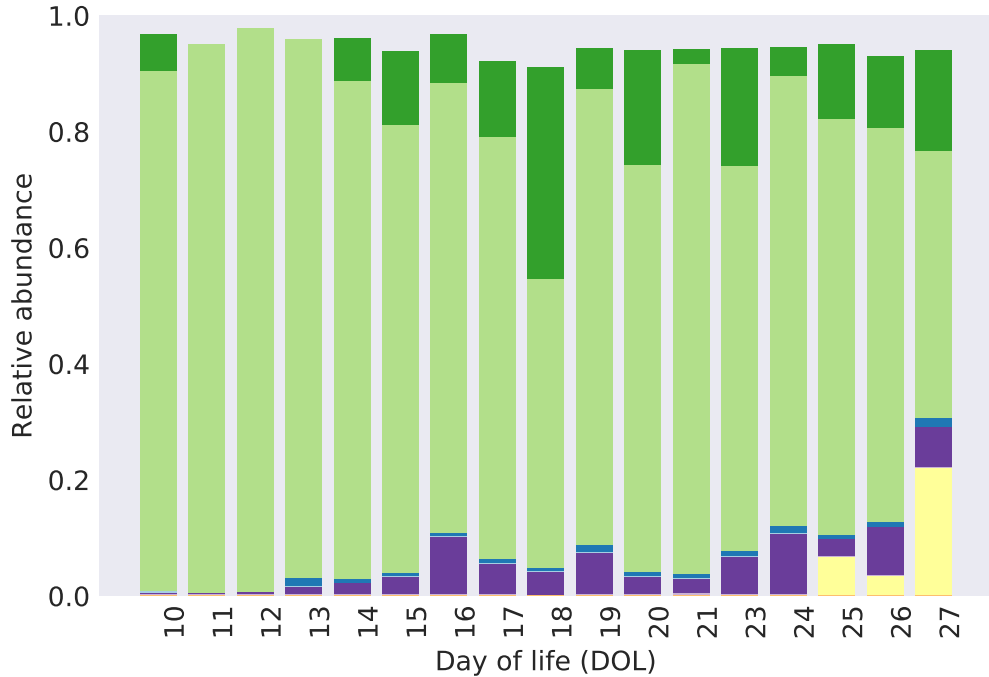

- *Bacteroides vulgatus*
- *Citrobacter koseri*
- *Clostridioides difficile*
- *Corynebacterium sp.*
- *Dermabacter vaginalis*
- *Desulfovibrio vulgaris*
- *Enterococcus faecalis*
- *Haemophilus parainfluenzae*
- *Klebsiella pneumoniae*
- *Staphylococcus epidermidis*
- *Streptococcus mitis*

## Infant 2

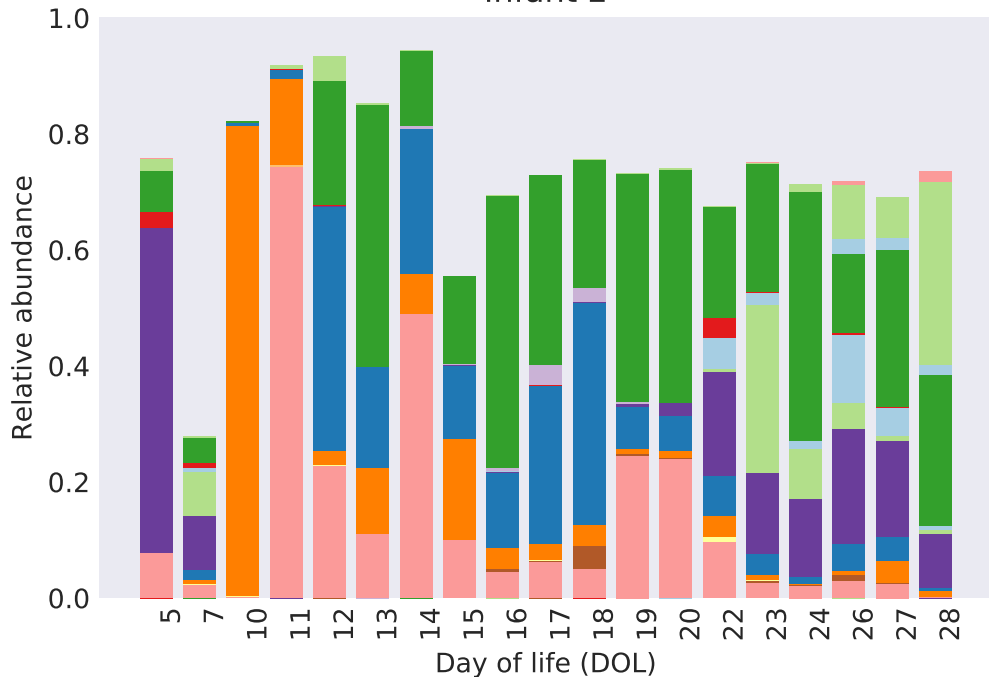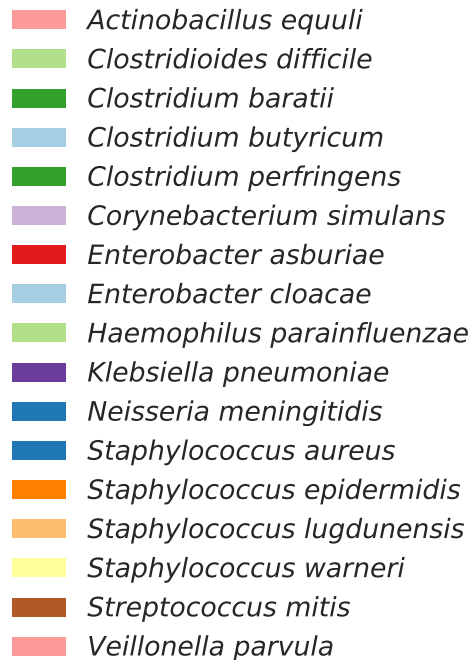

Infant 3

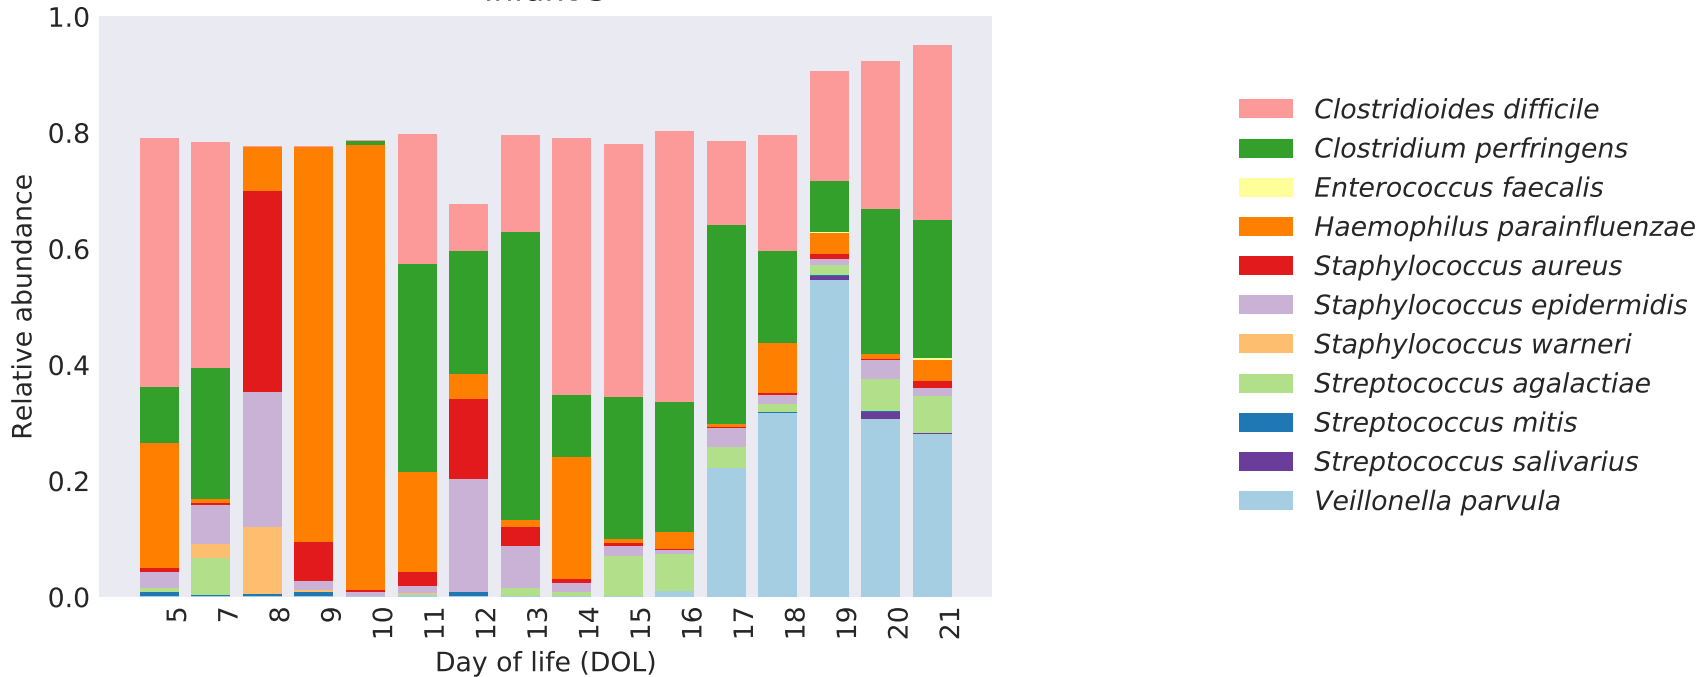

### Infant 4

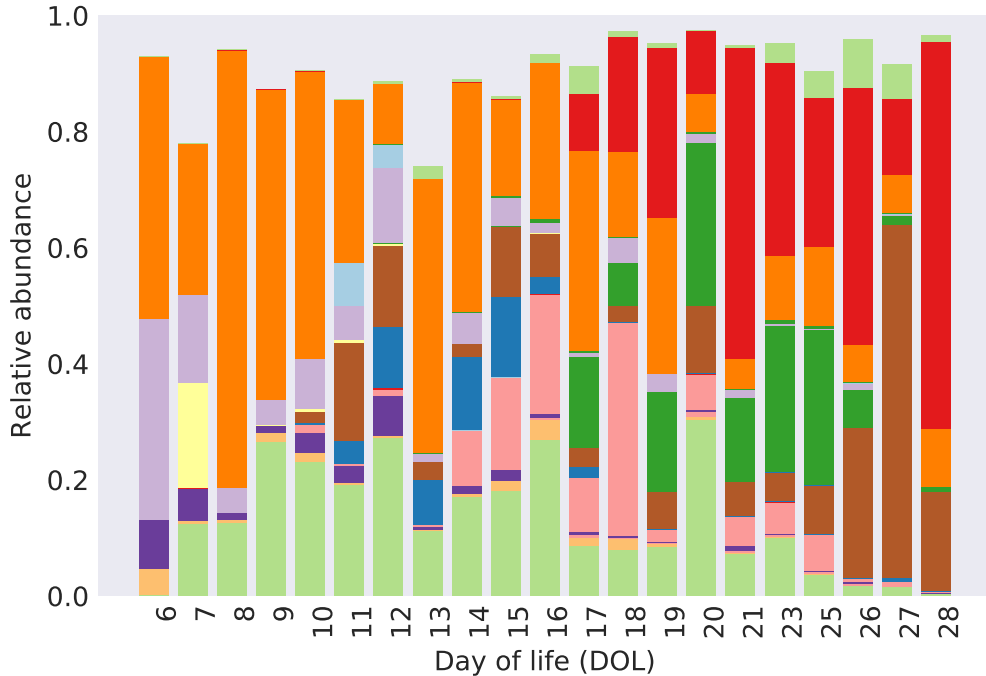

- *Clostridioides difficile*
- *Clostridium baratii*
- *Clostridium perfringens*
- *Eggerthella lenta*
- *Enterobacter cloacae*
- *Enterococcus faecalis*
- *Escherichia coli*
- *Fingoldia magna*
- *Haemophilus parainfluenzae*
- *Klebsiella michiganensis*
- *Klebsiella oxytoca*
- *Neisseria meningitidis*
- *Propionibacterium avidum*
- *Pseudomonas aeruginosa*
- *Staphylococcus epidermidis*
- *Streptococcus lutetiensis*
- *Streptococcus salivarius*
- *Veillonella parvula*

Infant 5

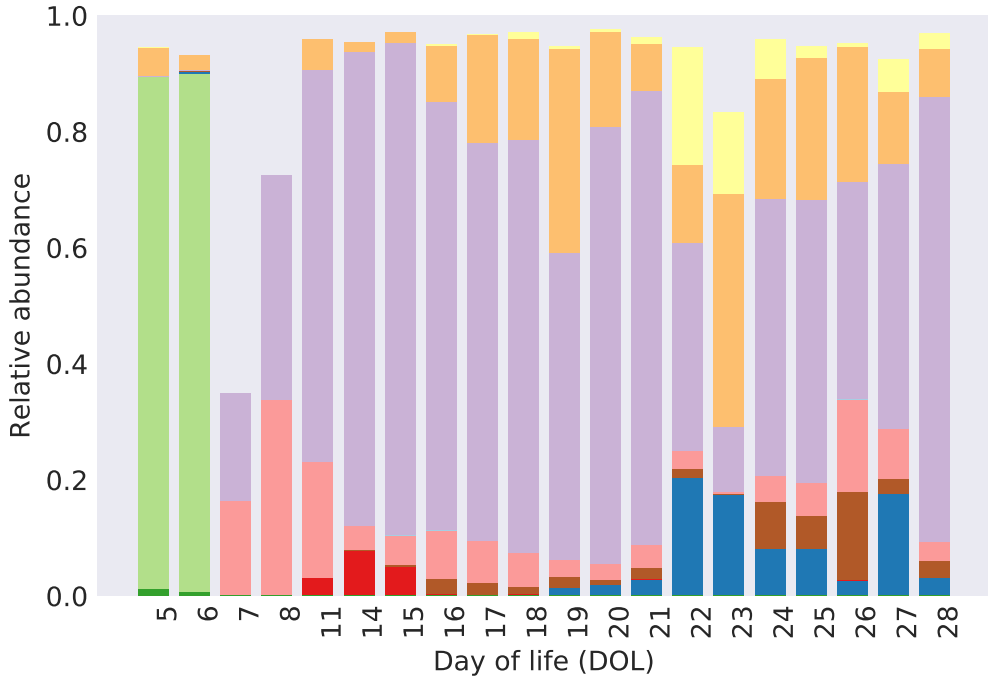

- *Clostridium perfringens*
- *Corynebacterium simulans*
- *Enterococcus faecalis*
- *Escherichia coli*
- *Fingoldia magna*
- *Klebsiella pneumoniae*
- *Propionibacterium avidum*
- *Pseudomonas aeruginosa*
- *Rothia mucilaginosa*
- *Serratia marcescens*
- *Staphylococcus aureus*
- *Staphylococcus epidermidis*
- *Streptococcus agalactiae*
- *Ureaplasma parvum*

Infant 6

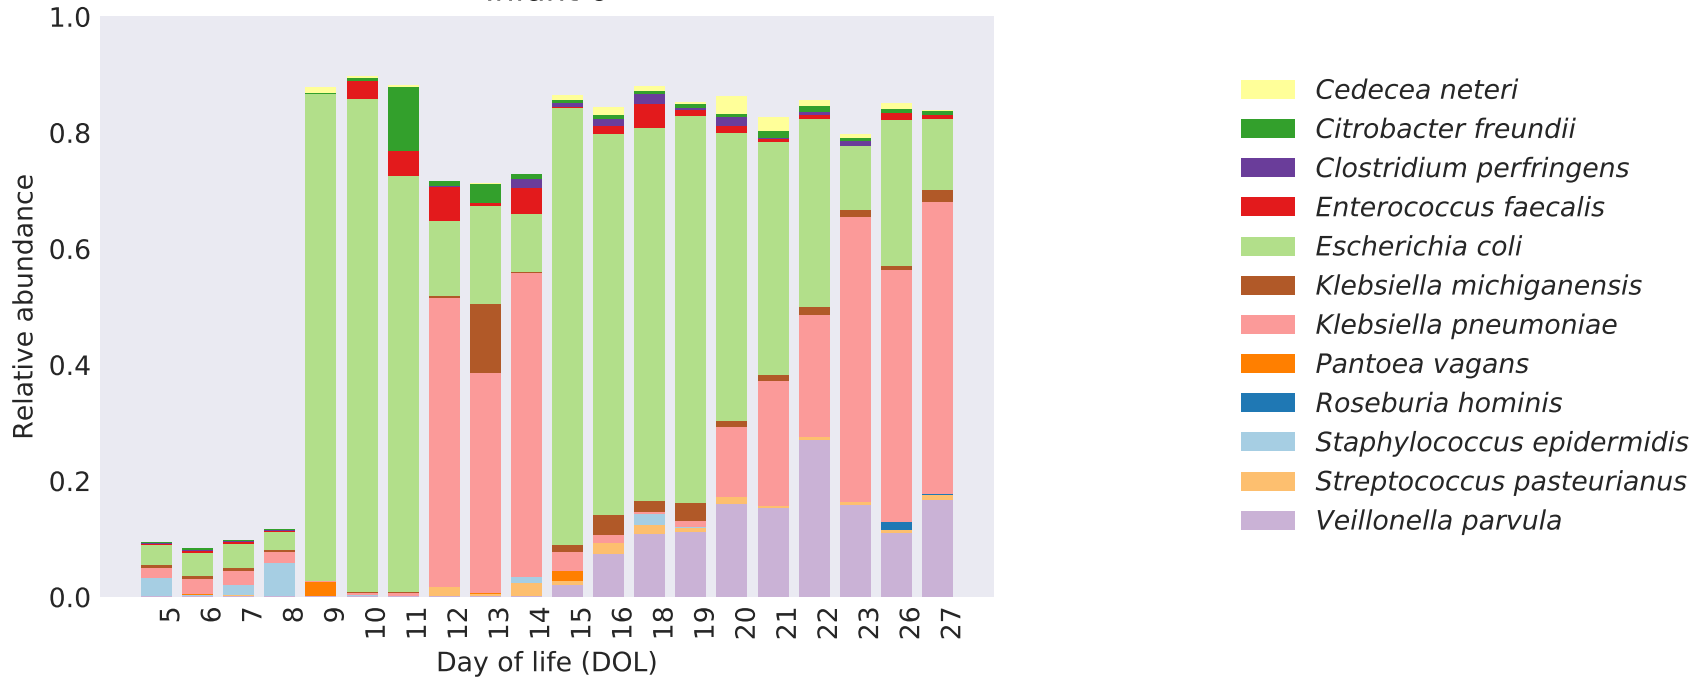

### Infant 8

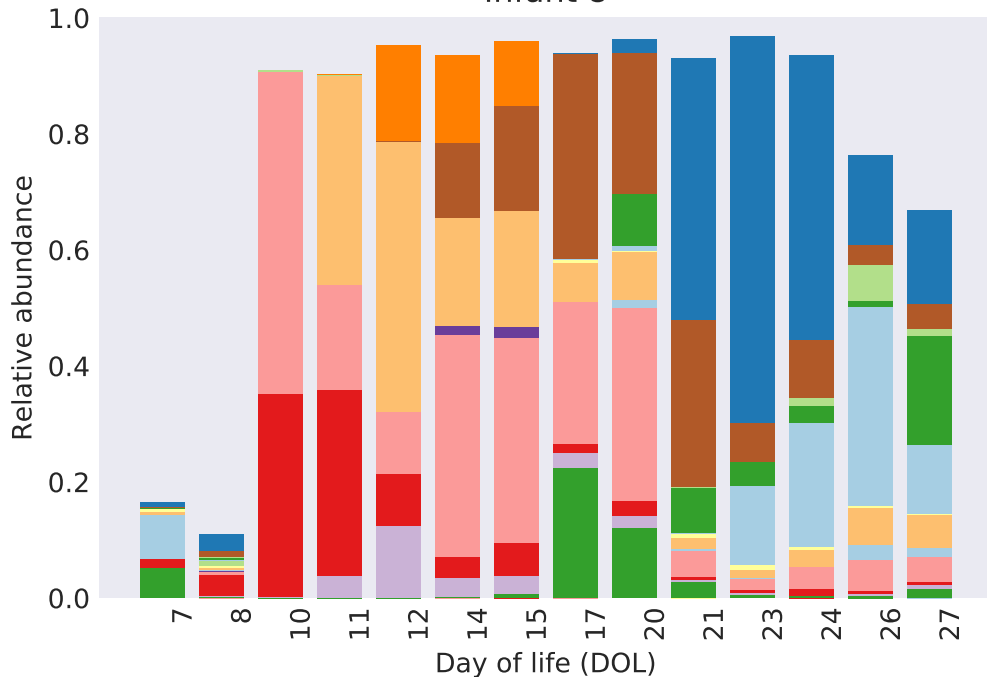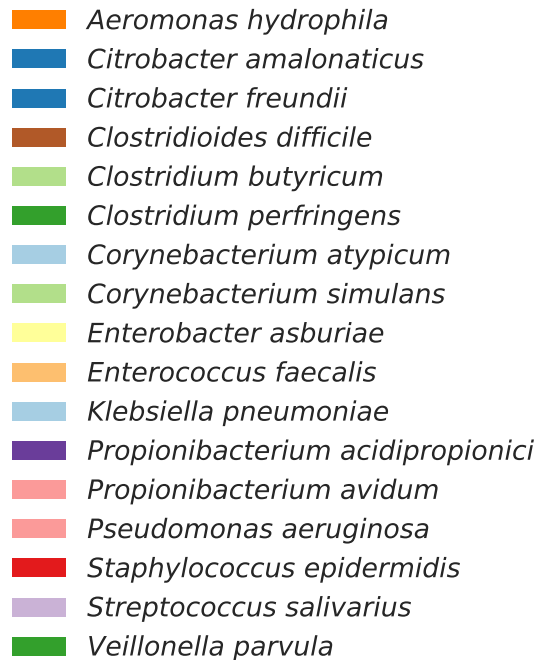

Infant 9

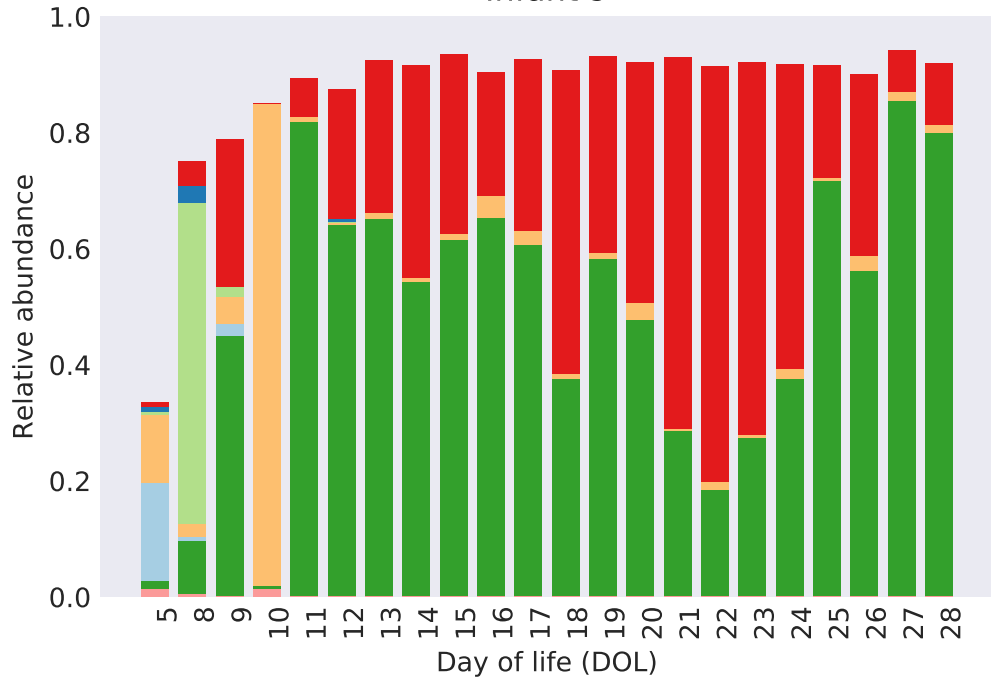

- *Citrobacter freundii*
- *Clostridium perfringens*
- *Corynebacterium simulans*
- *Enterococcus faecalis*
- *Helicobacter pylori*
- *Klebsiella pneumoniae*
- *Staphylococcus epidermidis*



Infant 10

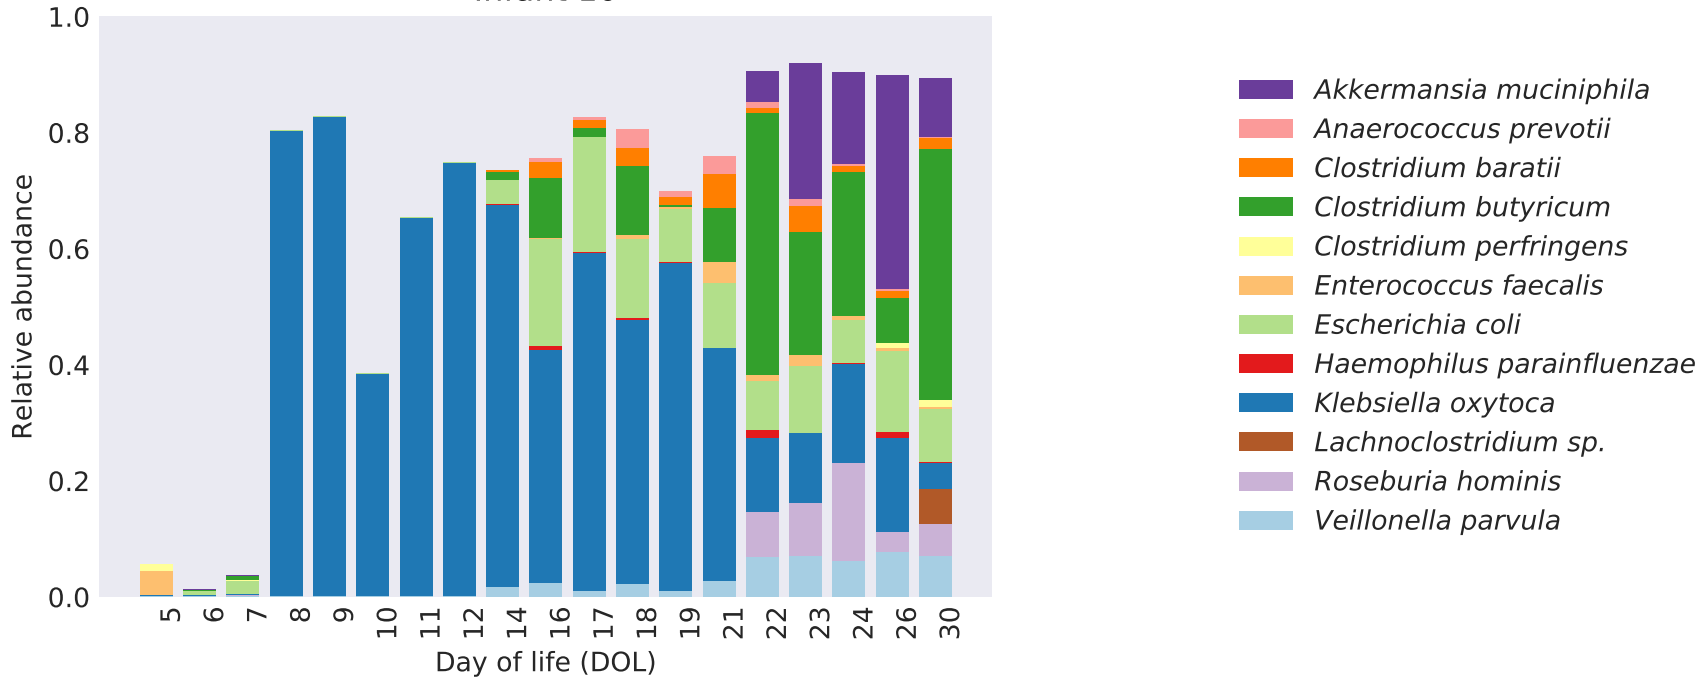

Infant 11

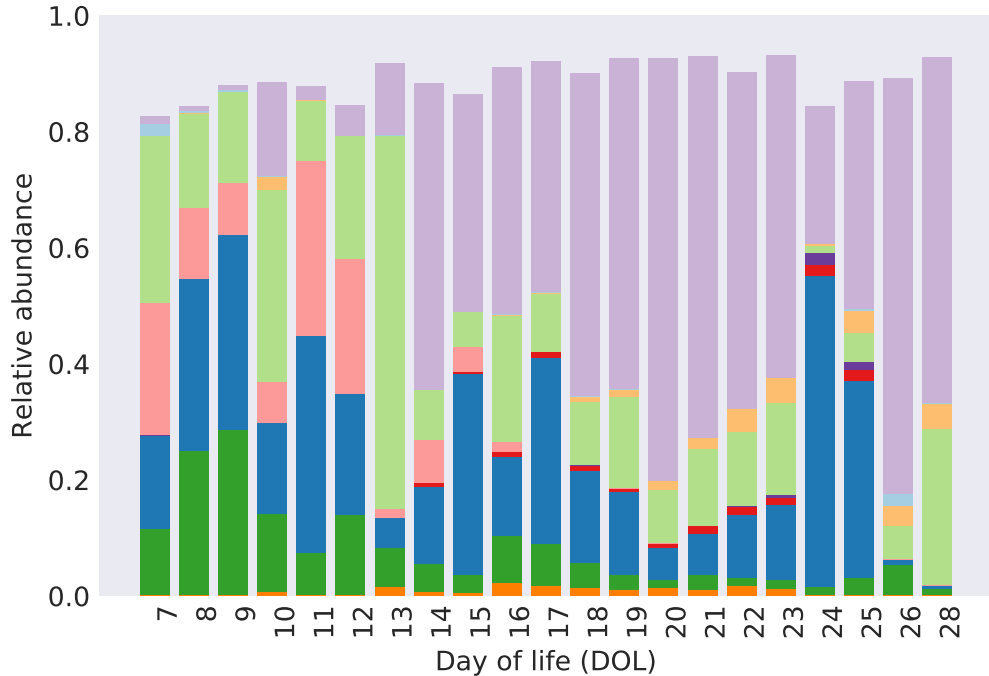

- Bacteroides fragilis*
- Bacteroides helcogenes*
- Bacteroides ovatus*
- Bacteroides thetaiotaomicron*
- Bacteroides vulgatus*
- Bifidobacterium bifidum*
- Clostridium perfringens*
- Escherichia coli*
- Parabacteroides distasonis*
- Streptococcus anginosus*

# Infant 12

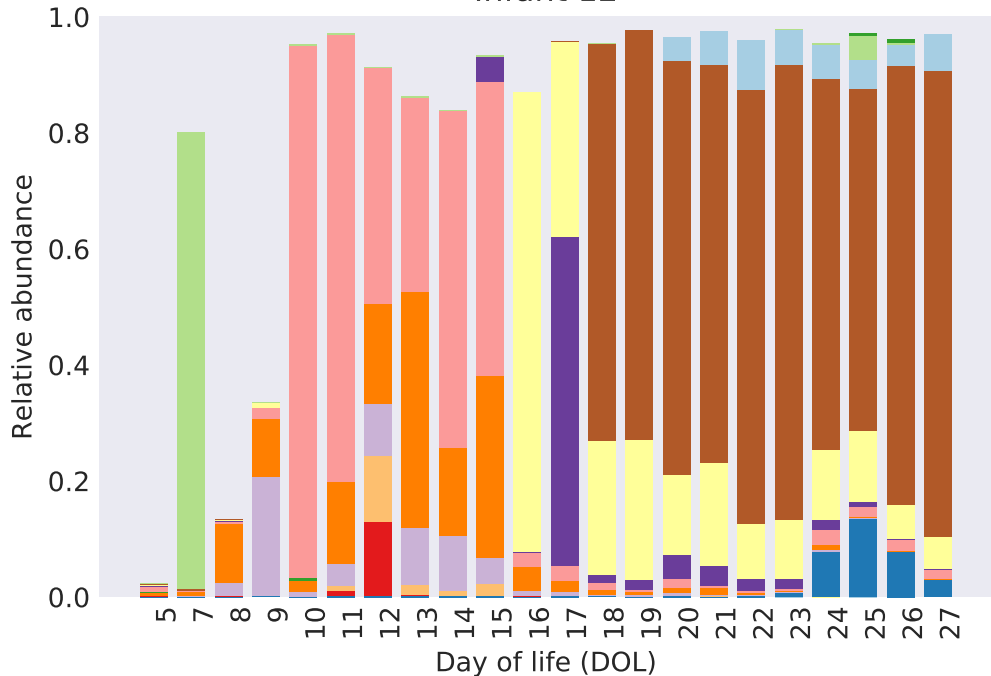

- *Acinetobacter baumannii*
- *Aeromonas hydrophila*
- *Bacillus subtilis*
- *Clostridioides difficile*
- *Clostridium butyricum*
- *Clostridium perfringens*
- *Enterobacter cloacae*
- *Enterococcus faecalis*
- *Escherichia coli*
- *Mobiluncus curtisii*
- *Pseudomonas putida*
- *Staphylococcus aureus*
- *Staphylococcus epidermidis*
- *Staphylococcus lugdunensis*
- *Streptococcus parasanguinis*
- *Streptococcus thermophilus*
- *Veillonella parvula*

### Infant 14

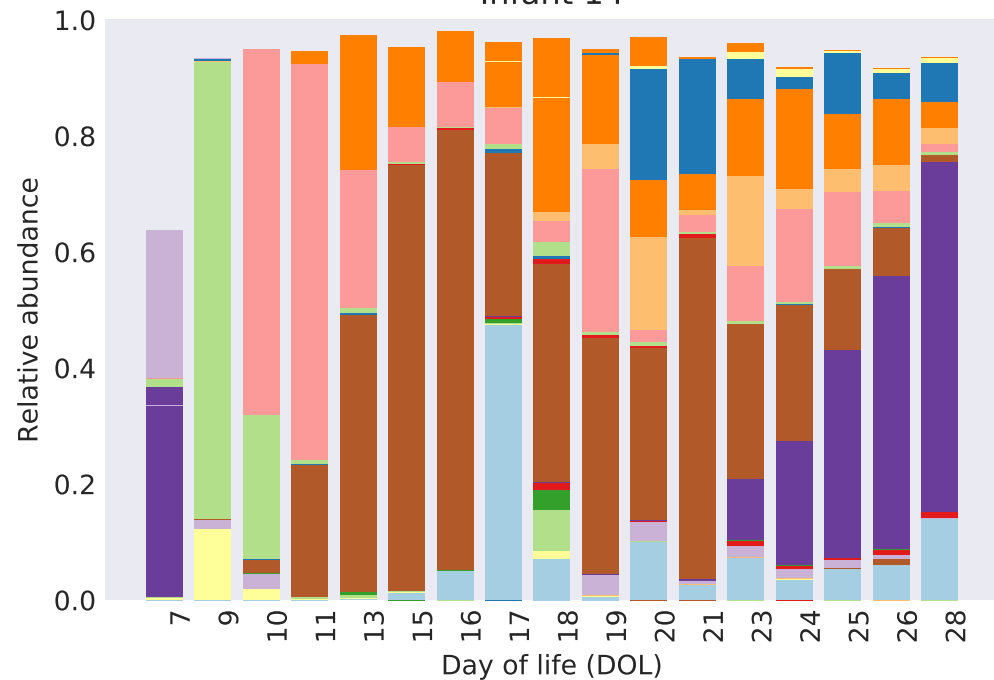

- *Actinomyces sp.*
- *Anaerococcus prevotii*
- *Azospirillum brasilense*
- *Clostridioides difficile*
- *Clostridium baratii*
- *Clostridium perfringens*
- *Corynebacterium kroppenstedtii*
- *Enterobacter asburiae*
- *Enterococcus faecalis*
- *Finexgoldia magna*
- *Haemophilus influenzae*
- *Hafnia alvei*
- *Klebsiella pneumoniae*
- *Kluyvera intermedia*
- *Peptoniphilus sp.*
- *Propionibacterium avidum*
- *Pseudomonas aeruginosa*
- *Pseudomonas putida*
- *Pseudomonas sp.*
- *Serratia marcescens*
- *Staphylococcus aureus*
- *Staphylococcus epidermidis*
- *Streptococcus mitis*
- *Veillonella parvula*

Infant 15

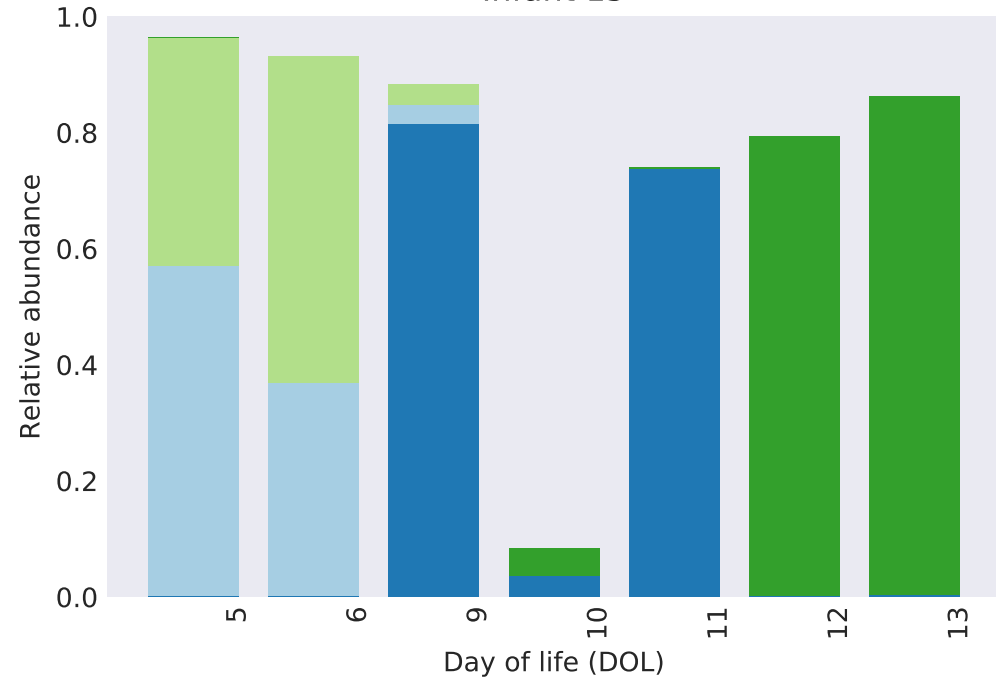

- Klebsiella pneumoniae*
- Mycoplasma hominis*
- Sneathia amnii*
- Staphylococcus epidermidis*

Infant 16

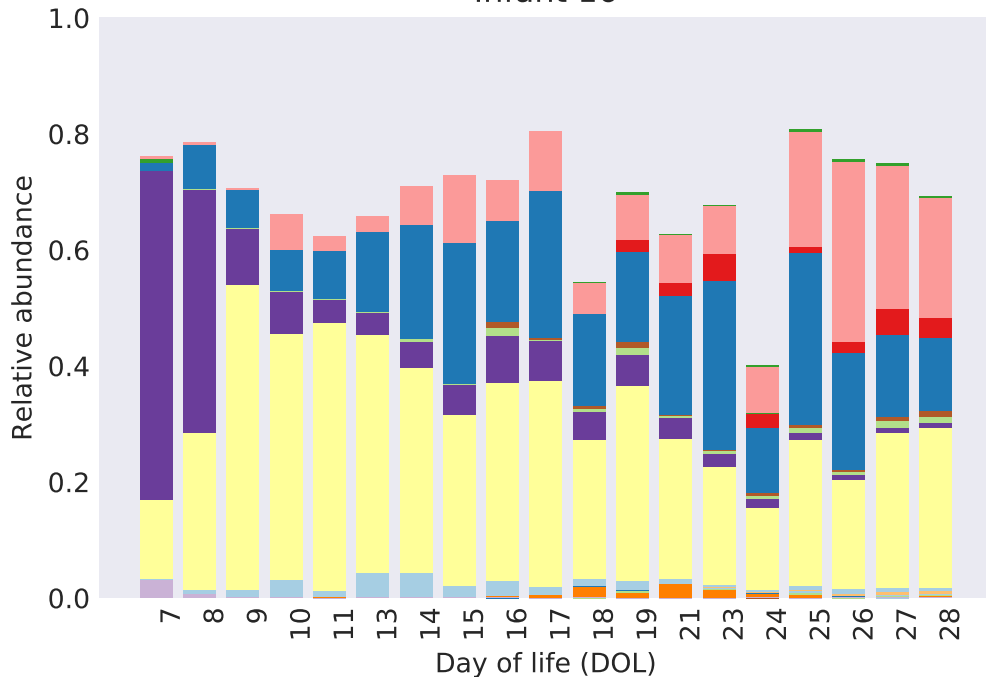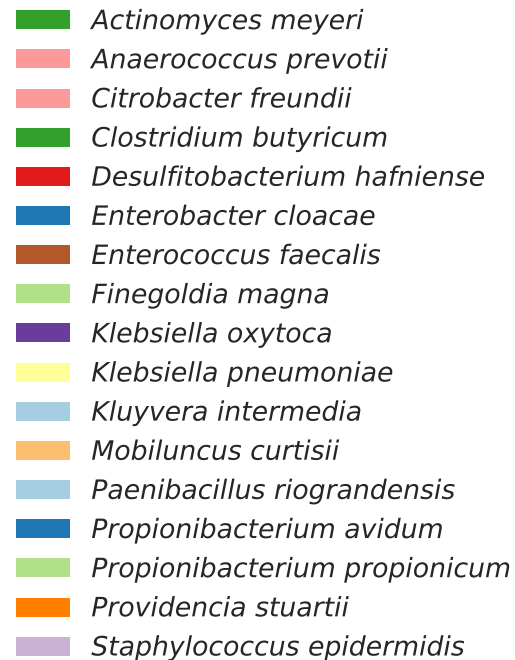

Infant 17

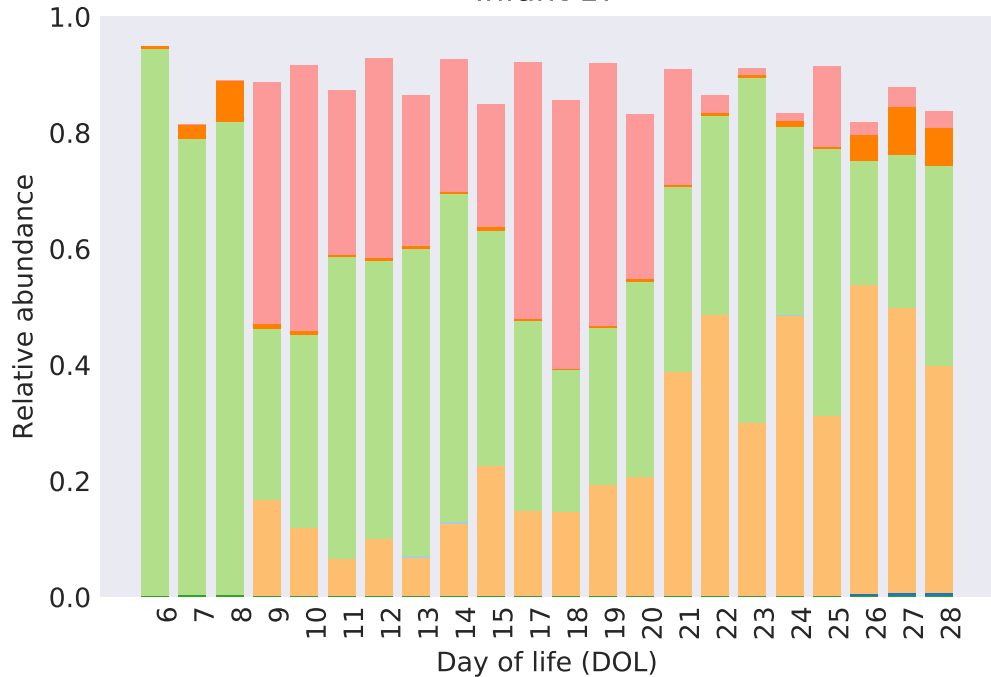

- *Acinetobacter baumannii*
- *Citrobacter freundii*
- *Enterococcus faecalis*
- *Escherichia coli*
- *Finegoldia magna*
- *Klebsiella oxytoca*
- *Mobiluncus curtisii*
- *Staphylococcus epidermidis*

# Infant 18

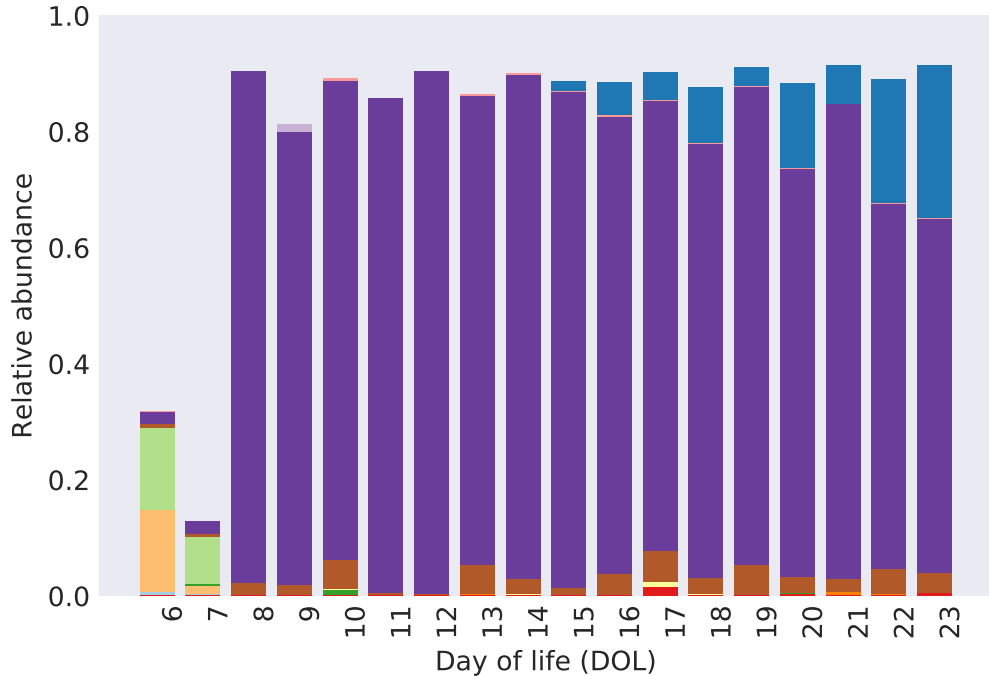

- Aeromonas hydrophila*
- Clostridioides difficile*
- Enterococcus faecalis*
- Escherichia coli*
- Klebsiella oxytoca*
- Klebsiella pneumoniae*
- Lactococcus lactis*
- Prevotella melaninogenica*
- Staphylococcus epidermidis*
- Streptococcus agalactiae*
- Streptococcus thermophilus*
- Veillonella parvula*
